# Supplementary material for: DNA Methylation Levels of the TBX5 Gene Promoter Are Associated with Congenital Septal Defects in Mexican Paediatric Patients
Source: MDPI journal article supplement (doi:10.3390/biology11010096), 2022-01-08
Supplement: s1 [file s1]

**Supplementary Table S1.** Exposure to environmental factors during pregnancy in mothers of patients with congenital septal defects.

| Environmental factors                | Congenital septal defects patients (n=35) | Controls (n=48) | <i>P</i> |
|--------------------------------------|-------------------------------------------|-----------------|----------|
| <b>Drug addiction (%)</b>            |                                           |                 | 0.566    |
| Alcoholism                           | 1 (2.9)                                   | 5 (10.4)        |          |
| Smoking                              | 6 (17.1)                                  | 7 (14.6)        |          |
| Alcoholism /Smoking                  | 0                                         | 1 (2.1)         |          |
| Unknown                              | 0                                         | 0               |          |
| No exposure                          | 28 (80)                                   | 35 (72.9)       |          |
| <b>Diseases during pregnancy (%)</b> |                                           |                 | 0.387    |
| Preeclampsia                         | 5 (14.3)                                  | 3 (6.3)         |          |
| Hypertension                         | 3 (8.6)                                   | 3 (6.3)         |          |
| Gestational diabetes                 | 3 (8.6)                                   | 1 (2.1)         |          |
| Diabetes mellitus type 1             | 0                                         | 1 (2.1)         |          |
| Diabetes mellitus type 2             | 2 (5.7)                                   | 1 (2.1)         |          |
| Epilepsy                             | 0                                         | 0               |          |
| Rheumatoid arthritis                 | 0                                         | 2 (4.2)         |          |
| Preeclampsia/DM T2                   | 0                                         | 0               |          |
| H/DM T1                              | 0                                         | 0               |          |
| DM T2/RA                             | 0                                         | 1 (2.1)         |          |
| H/RA                                 | 0                                         | 0               |          |
| Unknown                              | 0                                         | 1 (2.1)         |          |
| No exposure                          | 22 (62.9)                                 | 35 (72.9)       |          |
| <b>Exposure to pollutants (%)</b>    |                                           |                 | 0.993    |
| Heavy metals                         | 5 (14.3)                                  | 4 (8.3)         |          |
| Pesticides                           | 3 (8.6)                                   | 8 (16.7)        |          |
| Solvents                             | 6 (17.1)                                  | 2 (4.2)         |          |
| Herbicides                           | 1 (2.9)                                   | 2 (4.2)         |          |
| Varnishes                            | 0                                         | 3 (6.3)         |          |
| Unknown                              | 0                                         | 0               |          |
| No exposure                          | 20 (57.1)                                 | 29 (60.4)       |          |
| <b>Maternal infections (%)</b>       |                                           |                 | 0.001    |
| Urinary tract infection              | 10 (28.6)                                 | 21 (43.8)       |          |
| Vaginal candidiasis                  | 11 (31.4)                                 | 9 (18.8)        |          |
| UTI/VC                               | 8 (22.9)                                  | 0               |          |
| Unknown                              | 0                                         | 0               |          |
| No exposure                          | 6 (17.1)                                  | 18 (37.5)       |          |
| <b>Medication consumption (%)</b>    |                                           |                 | 0.069    |
| Nitrofurantoin                       | 4 (11.4)                                  | 2 (4.2)         |          |
| Nitrofurantoin/Insulin               | 1 (2)                                     | 0               |          |

|                                    |           |           |
|------------------------------------|-----------|-----------|
| Nitrofurantoin/Ampicillin          | 2 (5.7)   | 0         |
| Nitrofurantoin/ Nystatin           | 0         | 0         |
| Ampicillin                         | 1 (2.9)   | 3 (6.3)   |
| NSAIDs                             | 0         | 2 (4.2)   |
| NSAIDs/Nitrofurantoin              | 1 (2.9)   | 0         |
| Alfametildopa                      | 3 (8.6)   | 5 (10.4)  |
| Alfametildopa/Ampicillin           | 2 (5.7)   | 0         |
| Alfametildopa/Hydralazine          | 0         | 1 (2.1)   |
| Alfametildopa/Nitrofurantoin       | 2 (5.7)   | 0         |
| Alfametildopa/Dexamethasone        | 2 (5.7)   | 0         |
| Nystatin                           | 3 (8.6)   | 6 (12.5)  |
| Unknown                            | 0         | 0         |
| No exposure                        | 15 (42.9) | 29 (60.4) |
| <b>Consumption of vitamins (%)</b> |           | 0.108     |
| Folic Acid/Ferrous Fumarate        | 32 (91.4) | 47 (97.9) |
| Unknown                            | 2 (5.7)   | 0         |
| No exposure                        | 1 (2.9)   | 1 (2.1)   |

Data are expressed as percentage. *P* value were calculated using  $\chi^2$  test for categorical values. PDA, Patent Ductus Arteriosus, DM T1, Diabetes mellitus type 1, DM T2, Diabetes mellitus type 2, H, Hypertension, RA, Rheumatoid arthritis, UTI, Urinary Tract Infection, VC, Vaginal candidiasis, NSAIDs, Nonsteroidal anti-inflammatory drugs.

A)

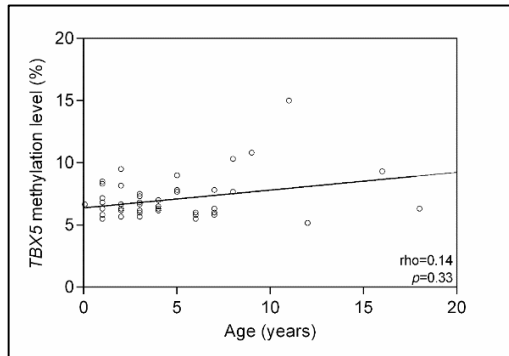

B)

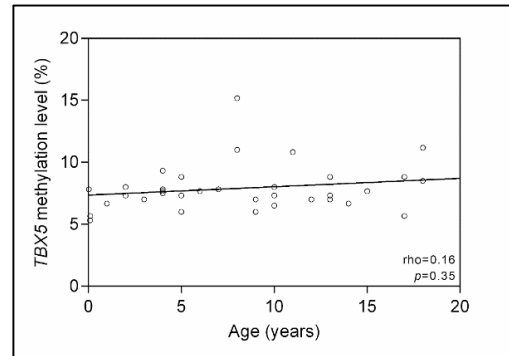

C)

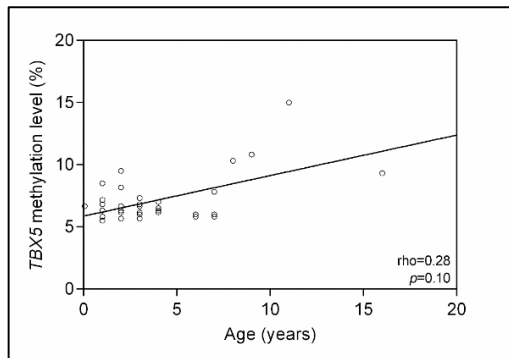

D)

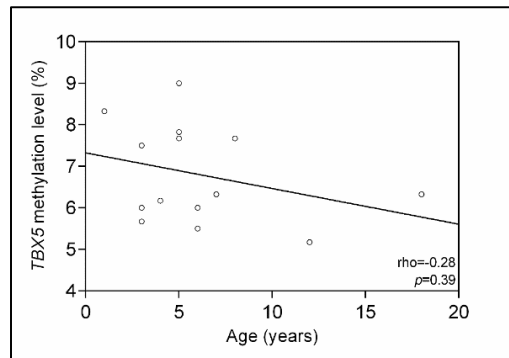

E)

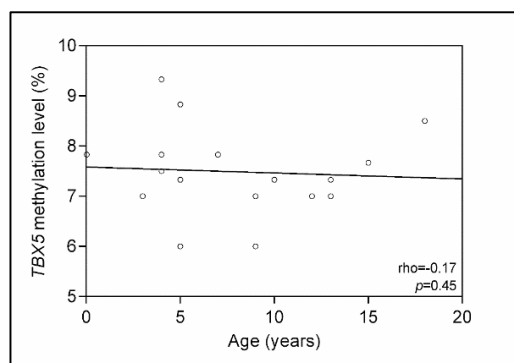

F)

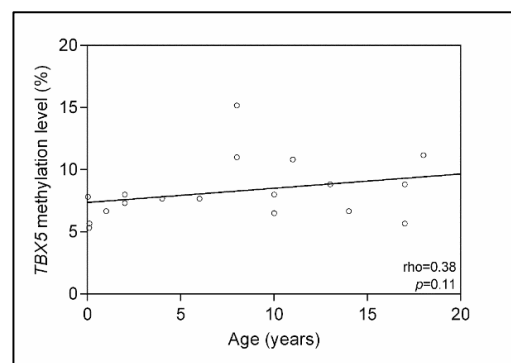

**Supplementary Figure S1.** Correlation of methylation levels (%) in the *TBX5* gene promoter and age expressed in years in the population study. **A)** Controls; **B)** Congenital Septal Defects patients; **C)** Women, controls; **D)** Men, controls; **E)** Women, Congenital Septal Defects patients; **F)** Men, Congenital Septal Defects patients. (Spearman).
